# Supplementary material for: Acuminatol and Other Antioxidative Resveratrol Oligomers from the Stem Bark of Shorea acuminata
Source: PubMed Central journal article supplement (PMC6268933; doi:10.3390/molecules17089043), 2012-07-30
Supplement: molecules-17-09043-s001.pdf [file molecules-17-09043-s001.pdf]

## Supplementary Materials

### Acuminatol and Other Antioxidative Resveratrol Oligomers from the Stem Bark of *Shorea acuminata*

Norhayati Muhammad <sup>1</sup>, Laily B. Din <sup>1</sup>, Idin Sahidin <sup>2</sup>, Siti Farah Hashim <sup>3</sup>, Nazlina Ibrahim <sup>3</sup>, Zuriati Zakaria <sup>4</sup> and Wan A. Yaacob <sup>1,\*</sup>

<sup>1</sup> School of Chemical Sciences and Food Technology, Faculty of Science and Technology, Universiti Kebangsaan Malaysia, UKM Bangi 43600, Selangor D.E., Malaysia; E-Mails: norhayatimuhammad@gmail.com (N.M.); lbdin@ukm.my (L.B.D.)

<sup>2</sup> Faculty of Mathematics and Natural Sciences, Haluoleo University, Kendari 93232, Sulawesi Tenggara, Indonesia; E-Mail: sahidin02@yahoo.com

<sup>3</sup> School of Biosciences and Biotechnology, Faculty of Science and Technology, Universiti Kebangsaan Malaysia, UKM Bangi 43600, Selangor D.E., Malaysia; E-Mails: farah\_samura@yahoo.com (S.F.H.); nazlina@ukm.my (N.I.)

<sup>4</sup> Malaysia-Japan International Institute of Technology, Universiti Teknologi Malaysia Kuala Lumpur, Jalan Semarak, Kuala Lumpur 54100, Malaysia; E-Mail: zuriz@ic.utm.my

\* Author to whom correspondence should be addressed; E-Mail: wanyaa@ukm.my; Tel.: +603-8921-5424; Fax: +603-8921-5410.

---

Acuminatol and Other Antioxidative Resveratrol Oligomers from the Stem Bark of *Shorea acuminata*.

Figure 1. <sup>1</sup>H-NMR spectrum of compound 1.

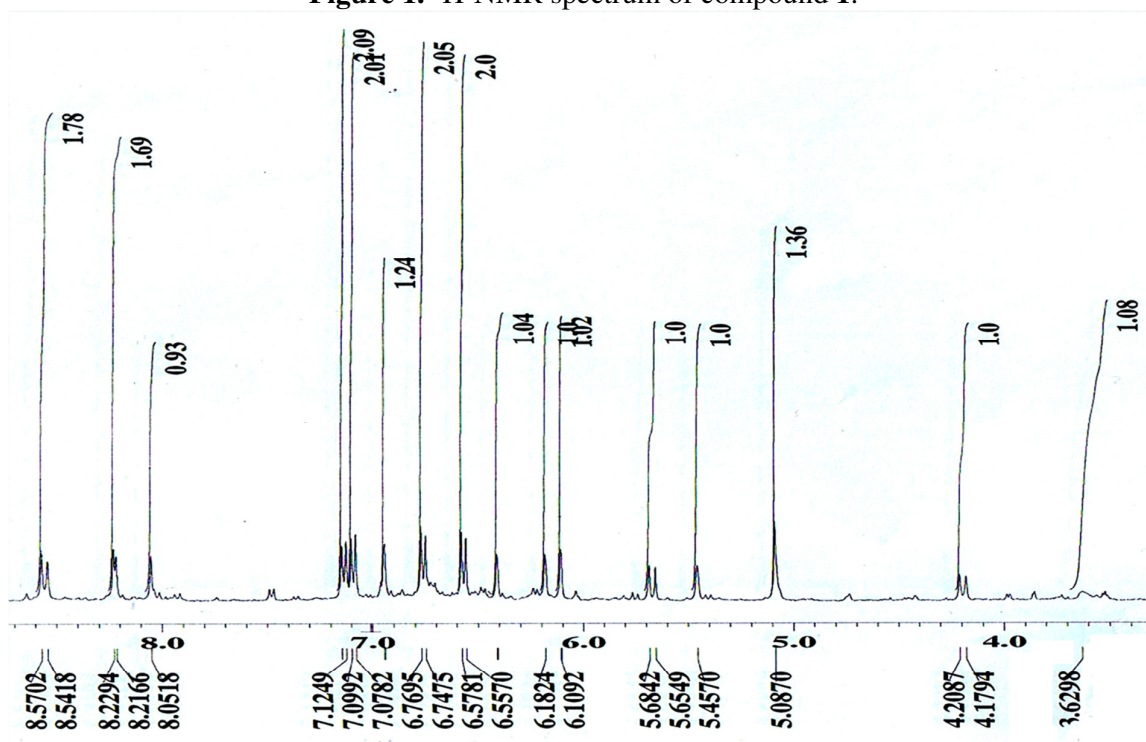

Figure 2.  $^{13}\text{C}$ -APT NMR spectrum of compound 1.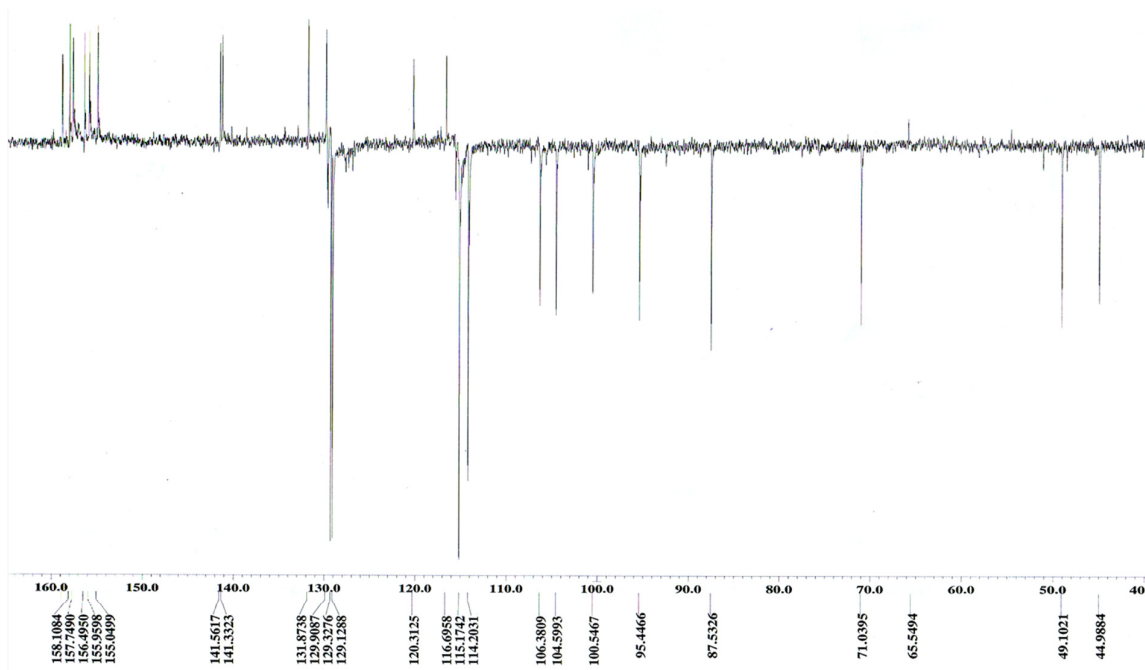

Figure 3. HMQC spectrum of compound 1.

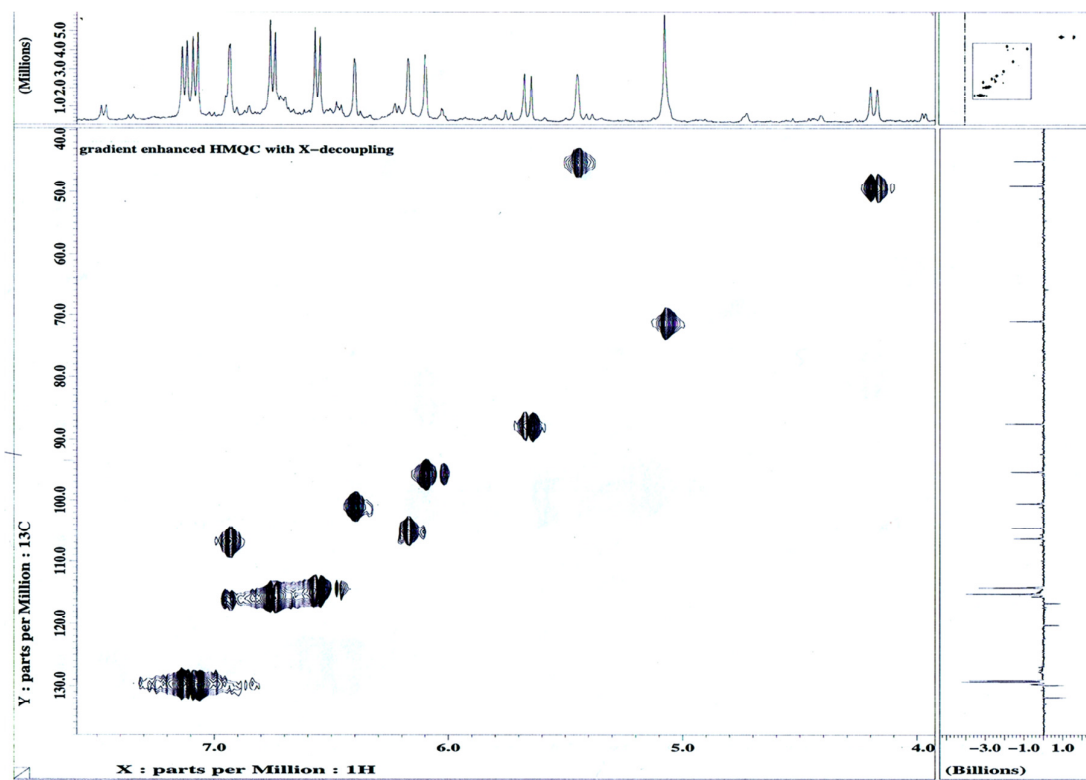

Figure 4. COSY spectrum of compound 1.

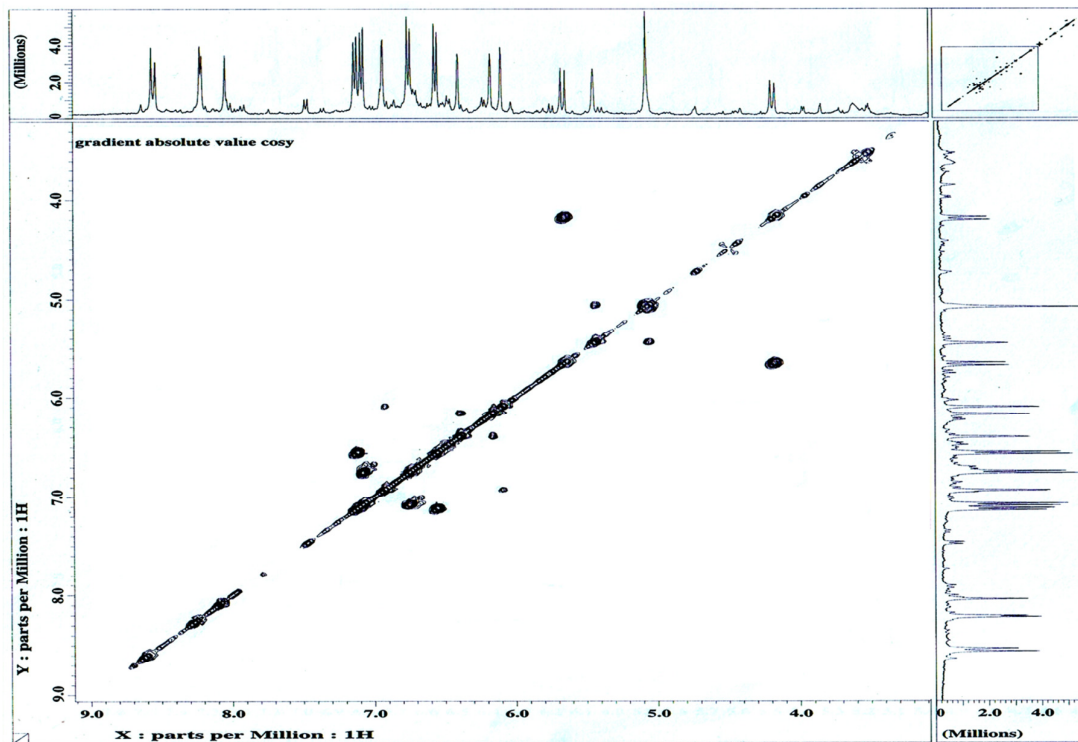

Figure 5. NOESY spectrum of compound 1.

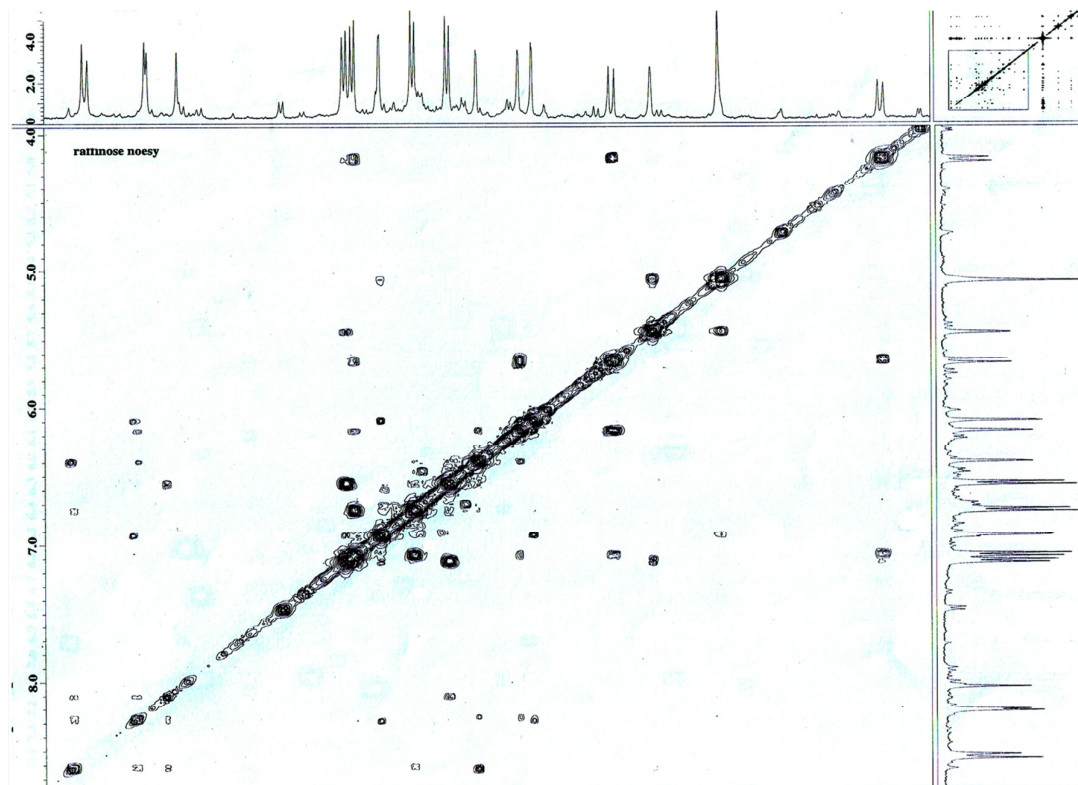

Figure 6. HMBC spectrum of compound 1.

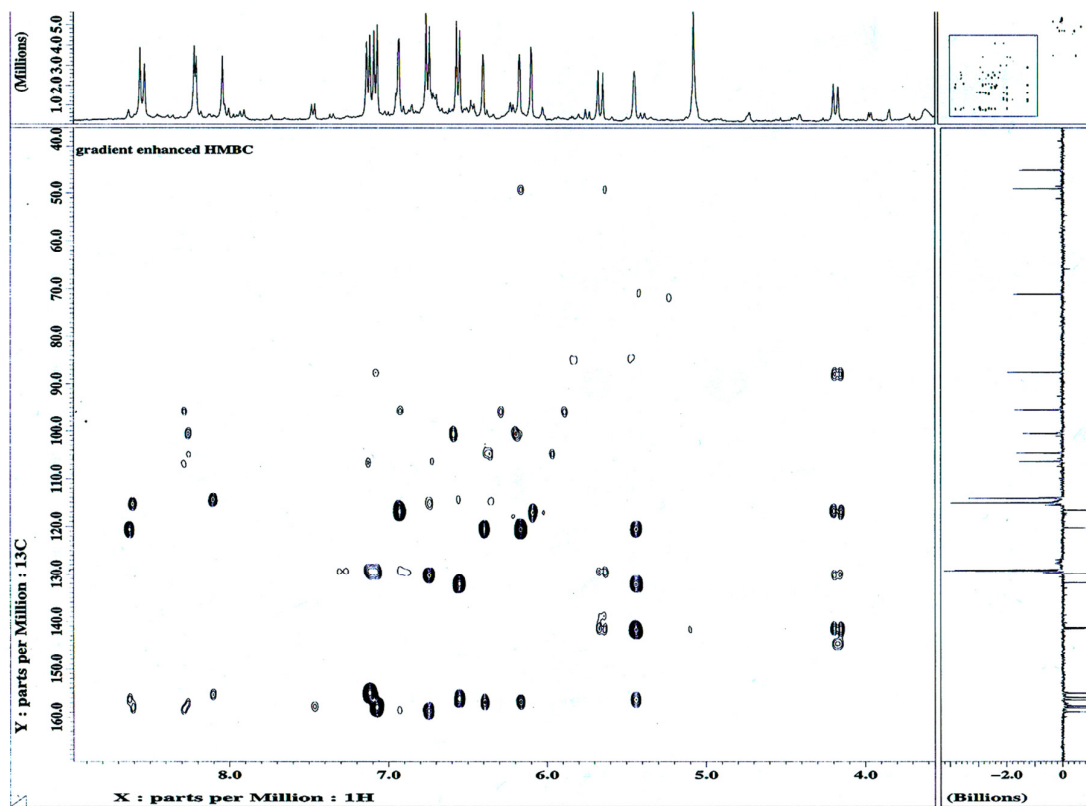

Figure 7. Mass spectrum of compound 1.

## Mass Spectrum Molecular Formula Report

|                      |                                        |                   |                        |
|----------------------|----------------------------------------|-------------------|------------------------|
| <b>Analysis Info</b> |                                        | Acquisition Date  | 11/10/2011 11:34:13 AM |
| Analysis Name        | D:\Data\sample 2011\norhayati\101121.d | Operator          | Alefee                 |
| Method               | direct infuse -ve.m                    | Instrument / Ser# | micrOTOF-Q 86          |
| Sample Name          | SAK 151742462                          |                   |                        |
| Comment              | 10.11.2011                             |                   |                        |

|                              |            |                       |           |                  |           |
|------------------------------|------------|-----------------------|-----------|------------------|-----------|
| <b>Acquisition Parameter</b> |            |                       |           |                  |           |
| Source Type                  | ESI        | Ion Polarity          | Negative  | Set Nebulizer    | 1.0 Bar   |
| Focus                        | Not active | Set Capillary         | 3500 V    | Set Dry Heater   | 190 °C    |
| Scan Begin                   | 50 m/z     | Set End Plate Offset  | -500 V    | Set Dry Gas      | 5.0 l/min |
| Scan End                     | 1100 m/z   | Set Collision Cell RF | 450.0 Vpp | Set Divert Valve | Waste     |

|                                             |         |                        |        |         |    |
|---------------------------------------------|---------|------------------------|--------|---------|----|
| <b>Generate Molecular Formula Parameter</b> |         |                        |        |         |    |
| Formula, min.                               | C20     | Tolerance              | 10 mDa | Charge  | -1 |
| Formula, max.                               | N0      | Minimum                | 0      | Maximum | 0  |
| Measured m/z                                | 469.128 | Electron Configuration | both   | Maximum | 3  |
| Check Valence                               | no      | Minimum                | 0      |         |    |
| Nitrogen Rule                               | no      |                        |        |         |    |
| Filter H/C Ratio                            | no      |                        |        |         |    |
| Estimate Carbon                             | yes     |                        |        |         |    |

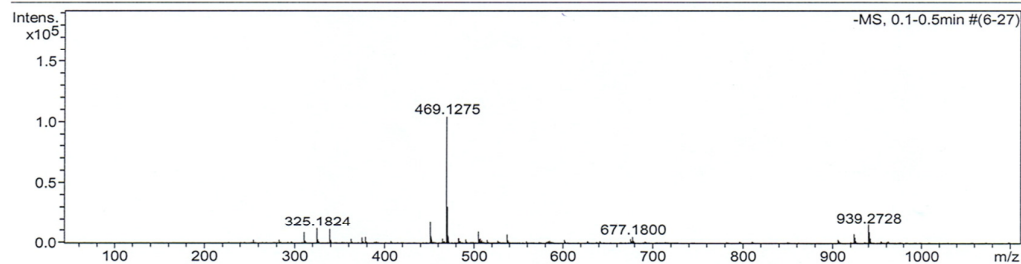

| Sum Formula    | Sigma | m/z      | Err [ppm] | Mean Err [ppm] | Err [mDa] | rdb   | N Rule | e <sup>-</sup> |
|----------------|-------|----------|-----------|----------------|-----------|-------|--------|----------------|
| C 21 H 25 O 12 | 0.033 | 469.1351 | 16.24     | 15.99          | 7.62      | 9.50  | ok     | even           |
| C 28 H 21 O 7  | 0.008 | 469.1293 | 3.72      | 3.46           | 1.74      | 18.50 | ok     | even           |
| C 35 H 17 O 2  | 0.046 | 469.1234 | -8.80     | -8.94          | -4.13     | 27.50 | ok     | even           |

**Figure 8.** UV spectrum of compound 1.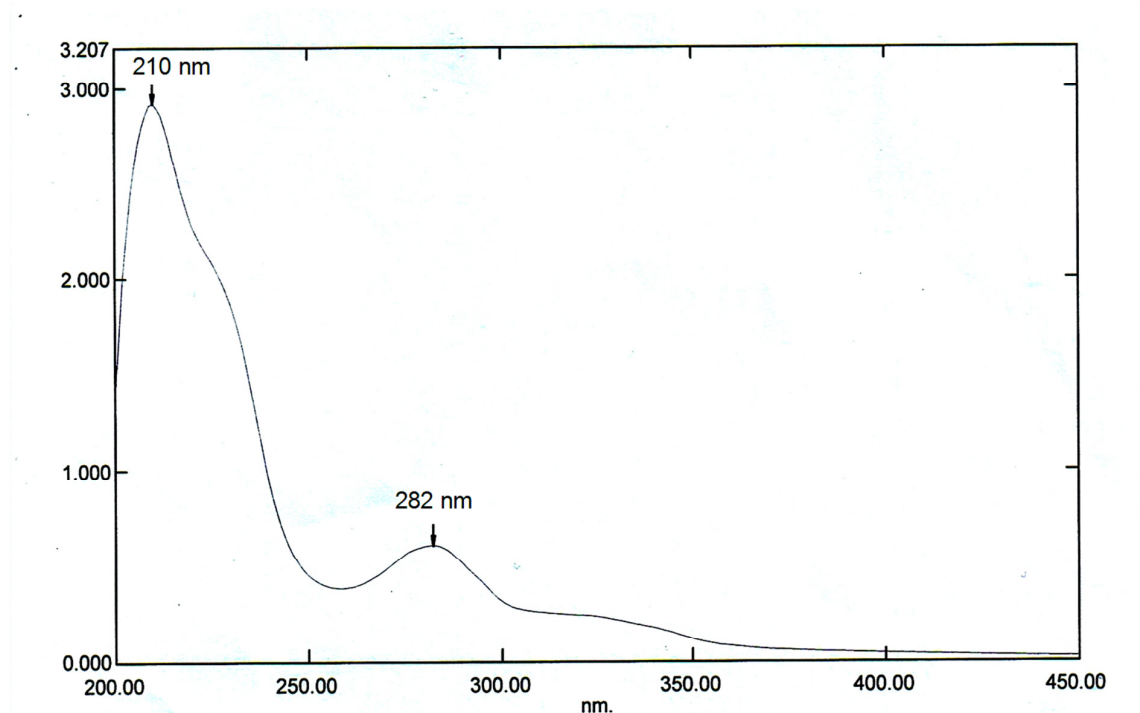**Figure 9.** IR spectrum of compound 1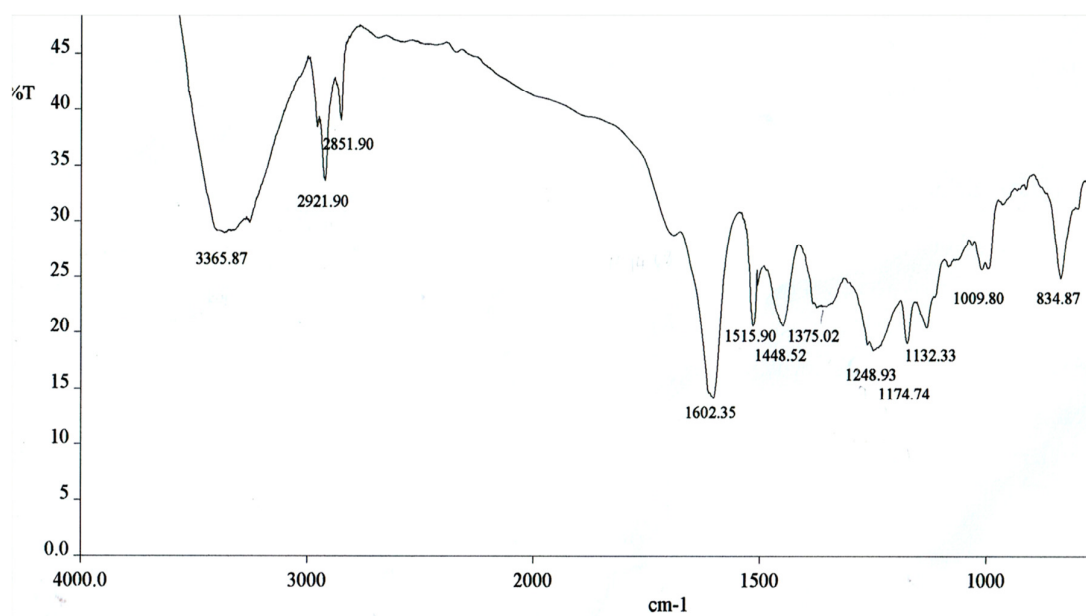

Figure 10.  $^1\text{H}$  NMR spectrum of compound 2.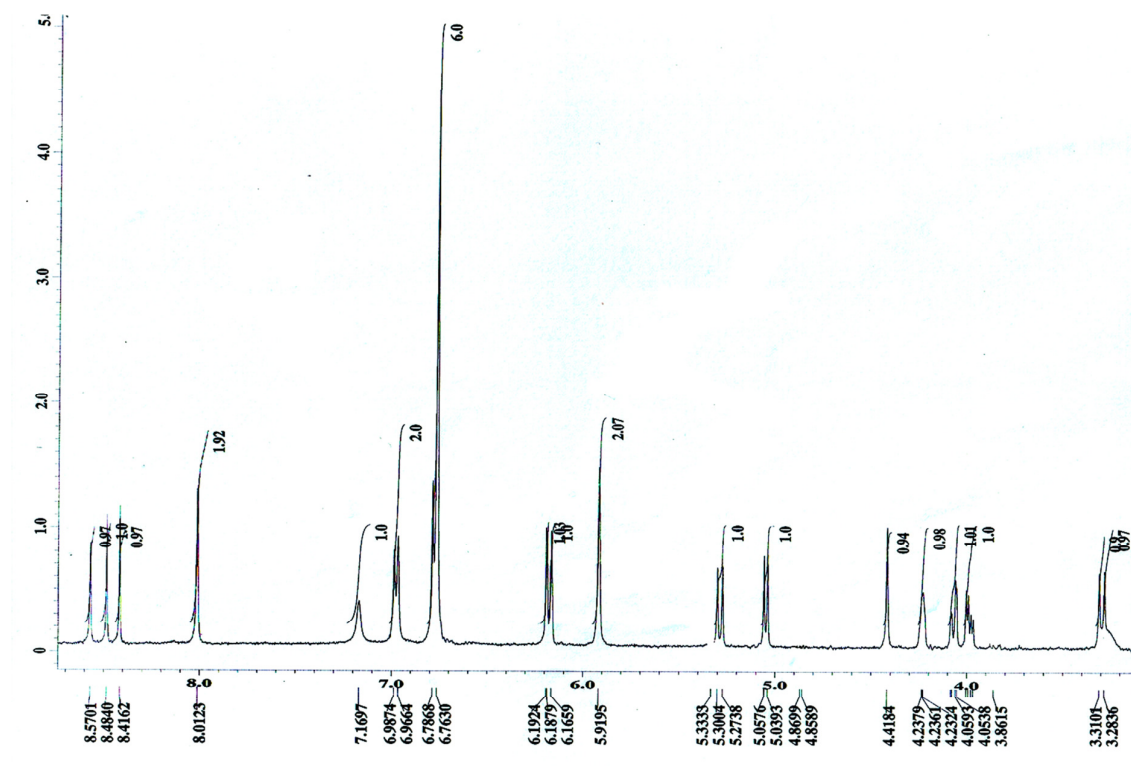Figure 11.  $^{13}\text{C}$ -APT NMR spectrum of compound 2.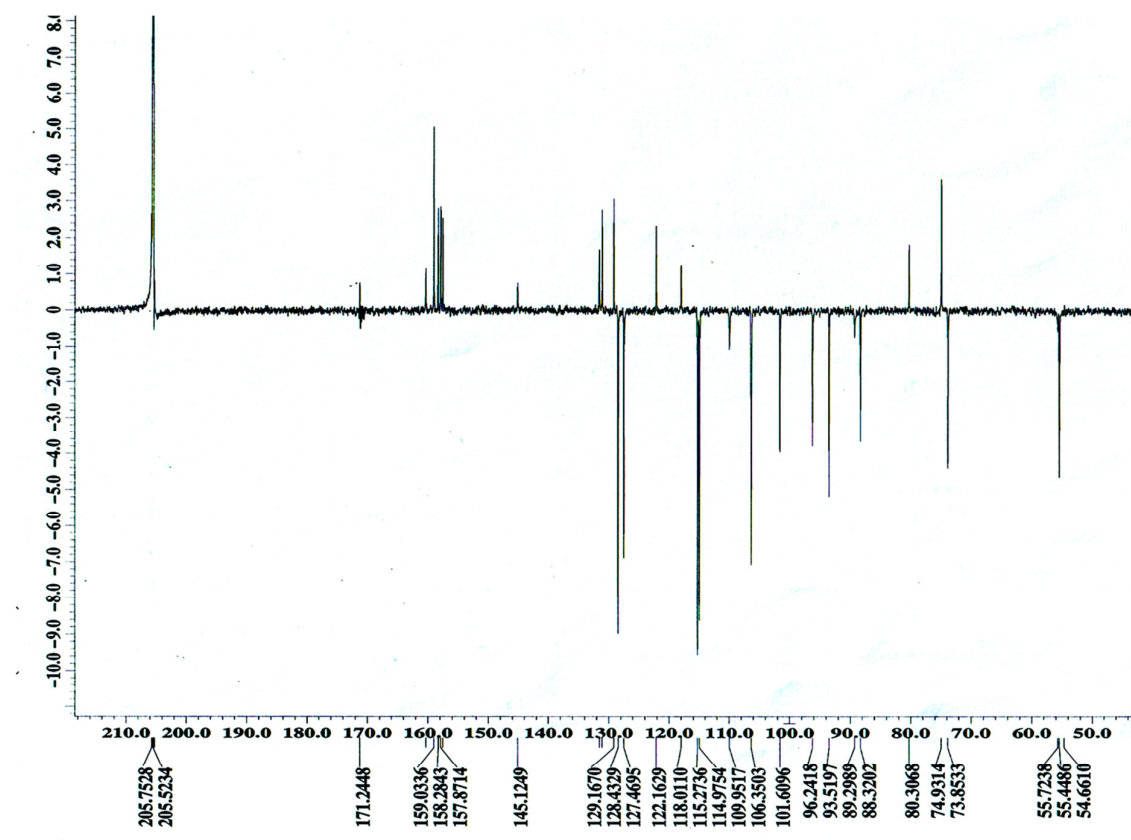

**Table 1.**  $^{13}\text{C}$ -NMR and  $^1\text{H}$ -NMR (100 MHz and 400 MHz, acetone- $d_6$ ) spectral data of **2**.

| Position | $\delta_{\text{C}}$ | $\delta_{\text{H}}$                          |
|----------|---------------------|----------------------------------------------|
| 1a       | 131.1               | -                                            |
| 2a/6a    | 128.3               | 6.78 (m)                                     |
| 3a/5a    | 115.3               | 6.78 (m)                                     |
| 4a       | 157.5               | -                                            |
| 7a       | 93.6                | 5.05 (d, 7.7)                                |
| 8a       | 55.4                | 3.30 (d, 10.6)                               |
| 9a       | 145.1               | -                                            |
| 10a/14a  | 106.3               | 5.92 (d, 2.9)                                |
| 11a/13a  | 158.9               | -                                            |
| 12a      | 101.7               | 6.17 (t, 1.08, 1.84)                         |
| 1b       | 129.1               | -                                            |
| 2b/6b    | 127.4               | 6.98 (d, 8.4)                                |
| 3b/5b    | 114.9               | 6.78 (m)                                     |
| 4b       | 158.2               | -                                            |
| 7b       | 89.2                | 5.29 (d, 10.6)                               |
| 8b       | 55.4                | 3.30 (d, 10.6)                               |
| 9b       | 131.6               | -                                            |
| 10b      | 124.6               | -                                            |
| 11b      | 160.3               | -                                            |
| 12b      | 96.3                | 6.19 (d, 2.2)                                |
| 13b      | 157.8               | -                                            |
| 14b      | 110.0               | 7.13 (br s)                                  |
| 1'       | 172.6               | -                                            |
| 2'       | 80.3                | -                                            |
| 3'       | 122.1               | -                                            |
| 4'       | 88.3                | 4.44 (br s)                                  |
| 5'       | 73.9                | 4.24 (m)                                     |
| 6'       | 74.9                | 3.99 (dd, 10.6, 4.8),<br>4.07 (dd, 9.2, 1.8) |

Figure 12.  $^1\text{H-NMR}$  spectrum of compound 3.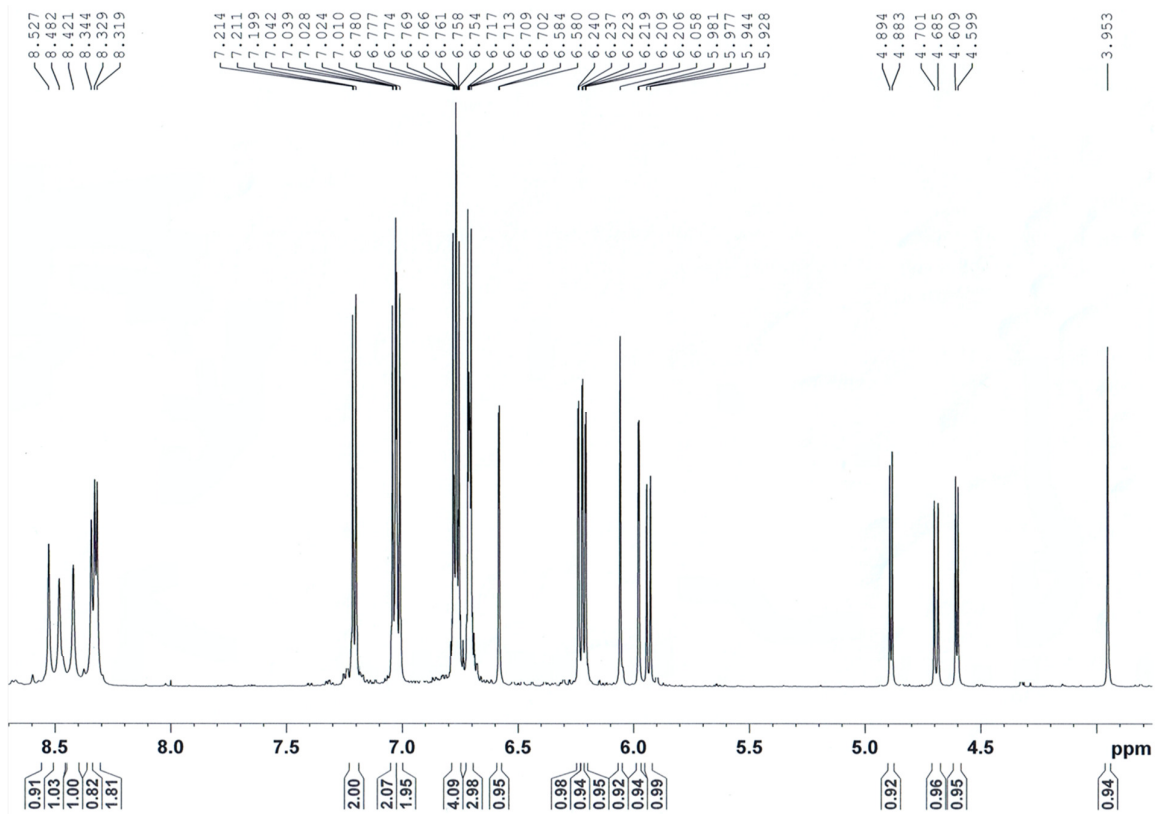Figure 13.  $^{13}\text{C-APT}$  NMR spectrum of compound 3.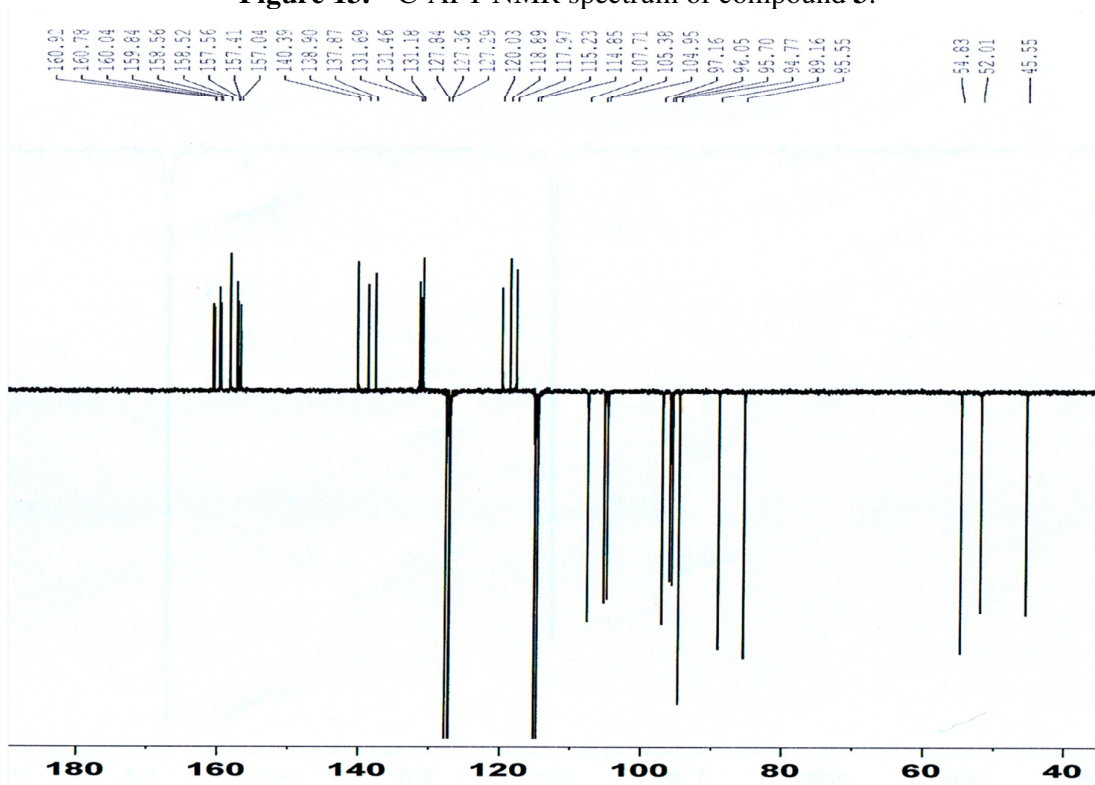



**Table 2.**  $^{13}\text{C}$ -NMR and  $^1\text{H}$ -NMR (150 MHz and 600 MHz, acetone- $d_6$ ) spectral data of **3**.

| Position                  | $\delta_{\text{C}}$ | $\delta_{\text{H}}$                       |
|---------------------------|---------------------|-------------------------------------------|
| 1a                        | 131.2               |                                           |
| 2a/6a                     | 127.3               | 7.21 (d, 9.0)                             |
| 3a/5a                     | 115.2               | 6.77 (d, 8.4)                             |
| 4a                        | 157.0               | -                                         |
| 7a                        | 89.2                | 5.94 (d, 9.6)                             |
| 8a                        | 52.0                | 4.69 (d, 9.6)                             |
| 9a                        | 137.8               | -                                         |
| 10a                       | 118.9               | -                                         |
| 11a                       | 159.8               | -                                         |
| 12a                       | 95.7                | 6.24 (d, 1.8)                             |
| 13a                       | 160.9               | -                                         |
| 14a                       | 104.9               | 6.58 (d, 2.4)                             |
| 1b                        | 131.7               | -                                         |
| 2b/6b                     | 127.8               | 7.04 (d, 8.4)                             |
| 3b/5b                     | 115.2               | 6.76 (d, 9.0)                             |
| 4b                        | 157.6               | -                                         |
| 7b                        | 94.8                | 4.89 (d, 6.6)                             |
| 8b                        | 54.8                | 4.60 (d, 6.0)                             |
| 9b                        | 138.9               | -                                         |
| 10b                       | 118.0               | -                                         |
| 11b                       | 158.5               | -                                         |
| 12b                       | 96.0                | 6.21 (d, 1.8)                             |
| 13b                       | 160.0               | -                                         |
| 14b                       | 107.7               | 5.98 (d, 2.4)                             |
| 1c                        | 131.5               |                                           |
| 2c/6c                     | 127.4               | 7.02 (d, 8.4)                             |
| 3c/5c                     | 114.8               | 6.71 (d, 9.0)                             |
| 4c                        | 157.4               | -                                         |
| 7c                        | 85.5                | 6.06 (s)                                  |
| 8c                        | 45.6                | 3.95 (s)                                  |
| 9c                        | 140.4               | -                                         |
| 10c                       | 120.0               | -                                         |
| 11c                       | 158.6               | -                                         |
| 12c                       | 97.2                | 6.22 (d, 2.4)                             |
| 13c                       | 160.8               | -                                         |
| 14c                       | 105.4               | 6.71 (d, 2.4)                             |
| 4a,4b,4c,13a,13b,13c (OH) |                     | 8.32, 8.33, 8.34,<br>8.42, 8.48, 8.53 (s) |

Figure 14.  $^1\text{H-NMR}$  spectrum of compound 4.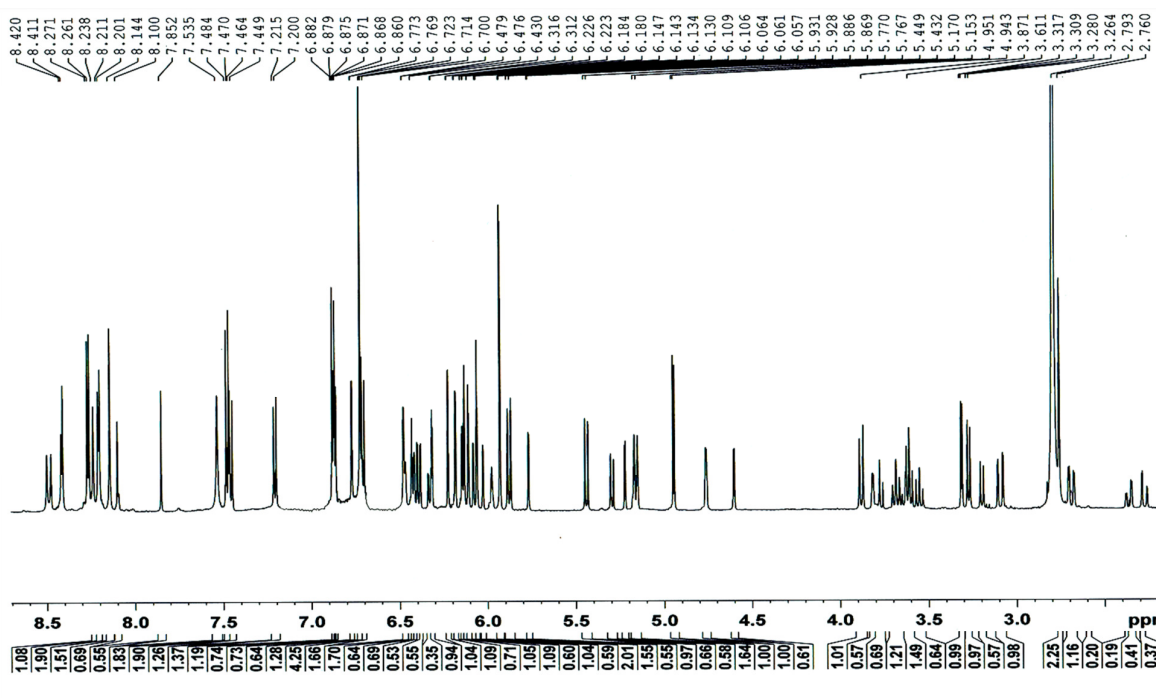Figure 15.  $^{13}\text{C-APT}$  NMR spectrum of compound 4.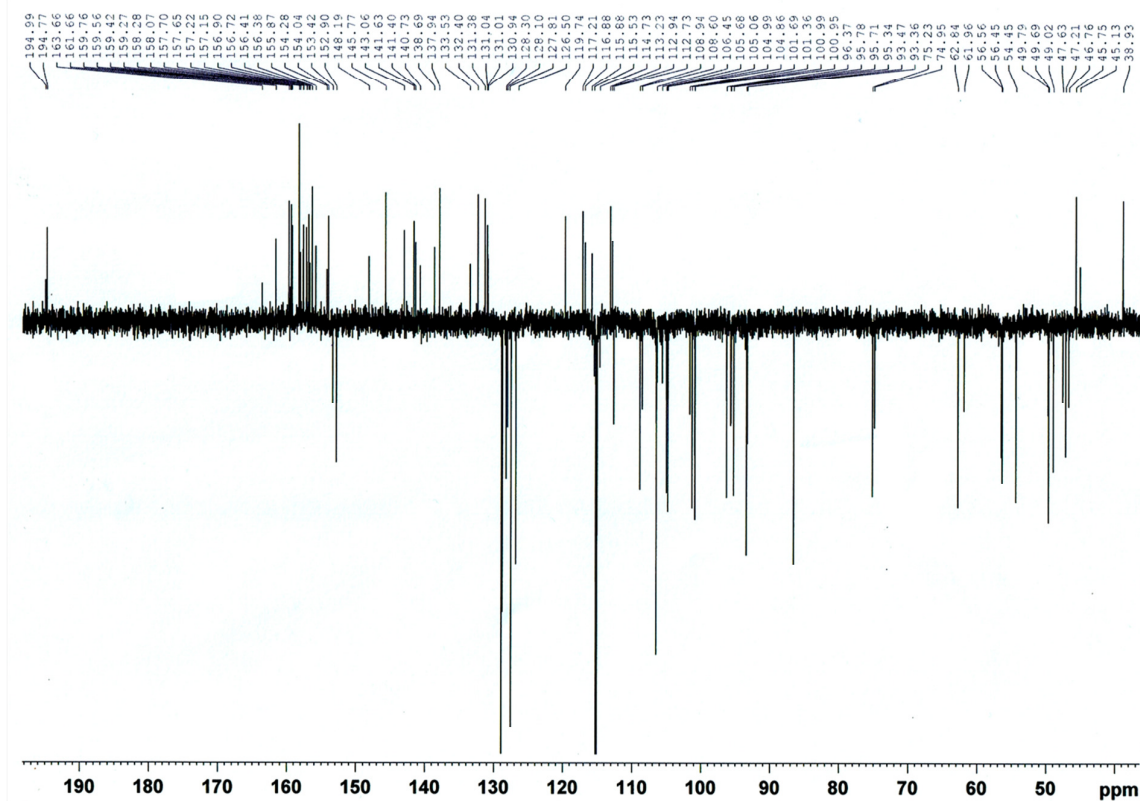

**Table 3.**  $^{13}\text{C}$ -NMR and  $^1\text{H}$ -NMR (150 MHz and 600 MHz, acetone- $d_6$ ) spectral data of **4**.

| Position | <b>4a</b>           |                                              | <b>4b</b>           |                                              |
|----------|---------------------|----------------------------------------------|---------------------|----------------------------------------------|
|          | $\delta_{\text{C}}$ | $\delta_{\text{H}}$                          | $\delta_{\text{C}}$ | $\delta_{\text{H}}$                          |
| 1a       | 131.04              | -                                            | 130.94              | -                                            |
| 2a, 6a   | 128.96              | 7.48 (d, 8.6)                                | 128.83              | 7.46 (d, 4.6)                                |
| 3a, 5a   | 115.30              | 6.88 (d, 8.4)                                | 115.30              | 6.87 (d, 9.0)                                |
| 4a       | 157.65              | -                                            | 157.70              | -                                            |
| 7a       | 86.63               | 5.88 (d, 10.2)                               | 86.63               | 5.88 (d, 10.2)                               |
| 8a       | 49.69               | 5.16 (br d, 10.2)                            | 49.79               | 5.16 (br d, 10.2)                            |
| 9a       | 141.63              | -                                            | 141.40              | -                                            |
| 10a      | 113.23              | -                                            | 112.94              | -                                            |
| 11a      | 154.04              | -                                            | 154.28              | -                                            |
| 12a      | 100.95              | 6.18 (d, 2.4)                                | 100.99              | 6.08 (d, 2.4)                                |
| 13a      | 156.90              | -                                            | 156.72              | -                                            |
| 14a      | 105.06              | 6.48 (d, 1.8)                                | 104.99              | 6.42 (br, s)                                 |
| 1b       | 45.75               | -                                            | 45.13               | -                                            |
| 2b       | 75.23               | 4.77 (m)                                     | 74.95               | 3.81 (m)                                     |
| 3b       | 38.93               | 2.69 (dd, 16.8, 3.0)<br>3.09 (dd, 17.4, 1.8) | 38.93               | 2.36 (dd, 17.4, 3.6)<br>2.27 (dd, 17.4, 1.8) |
| 4b       | 194.77              | -                                            | 194.99              | -                                            |
| 5b       | 128.30              | 5.44 (d, 10.2)                               | 128.10              | 5.29 (d, 10.2)                               |
| 6b       | 152.90              | 6.39 (dd, 10.2, 2.4)                         | 153.42              | 6.33 (dd, 10.2, 2.4)                         |
| 7b       | 47.21               | 3.88 (d, 12.0)                               | 47.63               | 3.73 (d, 11.4)                               |
| 8b       | 49.02               | 3.68 (t, 11.4, 12.0)                         | 46.76               | 3.61 (t, 9.0, 11.4)                          |
| 9b       | 137.94              | -                                            | 138.69              | -                                            |
| 10b      | 117.21              | -                                            | 116.88              | -                                            |
| 11b      | 159.42              | -                                            | 159.56              | -                                            |
| 12b      | 96.37               | 6.13 (d, 2.4)                                | 95.78               | 6.14 (d, 2.4)                                |
| 13b      | 156.38              | -                                            | 157.65              | -                                            |
| 14b      | 108.94              | 6.11 (d, 1.8)                                | 108.60              | 6.02 (d, 1.8)                                |
| 1c       | 131.38              | -                                            | 131.01              | -                                            |
| 2c/6c    | NI                  | NI                                           | NI                  | NI                                           |
| 3c/5c    | NI                  | NI                                           | NI                  | NI                                           |
| 4c       | 156.41              | -                                            | 155.87              | -                                            |
| 7c       | 62.84               | 3.27 (d, 9.6)                                | 56.56               | 3.19 (d, 10.8)                               |
| 8c       | 56.45               | 3.61 (t, 9.0, 11.4)                          | 61.96               | 3.55 (t, 11.4)                               |
| 9c       | 143.06              | -                                            | 140.73              | -                                            |
| 10c      | 119.74              | -                                            | 115.88              | -                                            |
| 11c      | 161.66              | -                                            | 163.66              | -                                            |
| 12c      | 95.34               | 6.22 (d, 1.8)                                | 95.71               | 6.31 (d, 2.4)                                |
| 13c      | 159.27              | -                                            | 158.07              | -                                            |
| 14c      | 104.86              | 6.77 (d, 2.4)                                | 112.73              | 5.77 (d, 2.4)                                |
| 1d       | 132.40              | -                                            | 133.53              | -                                            |
| 2d, 6d   | 127.57              | 6.72 (s)                                     | 126.88              | 7.21 (d, 9.0)                                |
| 3d, 5d   | 115.12              | 6.72 (s)                                     | 115.30              | 6.71 (d, 8.4)                                |
| 4d       | 157.22/157.15       | -                                            | 157.15              | -                                            |
| 7d       | 93.47               | 4.95 (d, 4.8)                                | 93.36               | 5.22 (d, 2.4)                                |

Table 3. Cont.

| Position | 4a         |                    | 4b         |                    |
|----------|------------|--------------------|------------|--------------------|
|          | $\delta_C$ | $\delta_H$         | $\delta_C$ | $\delta_H$         |
| 8d       | 54.45      | 3.31 (d, 4.8)      | 56.56      | 4.60 (d, 2.4)      |
| 9d       | 145.77     | -                  | 148.19     | -                  |
| 10d      | 106.55     | 5.93 (d, 1.8)      | 105.68     | 5.98 (br s)        |
| 11d      | 158.28     | -                  | 159.76     | -                  |
| 12d      | 101.36     | 6.06 (t, 1.8, 2.4) | 101.69     | 6.43 (t, 1.8, 2.4) |
| 13d      | 158.28     | -                  | 159.76     | -                  |
| 14d      | 106.55     | 5.93 (d, 1.8)      | 106.45     | 6.47 (br, s)       |

<sup>4a</sup>, <sup>4b</sup>, represent for major and minor conformer; NI: not identified.

Figure 16. <sup>1</sup>H-NMR spectrum of compound 5.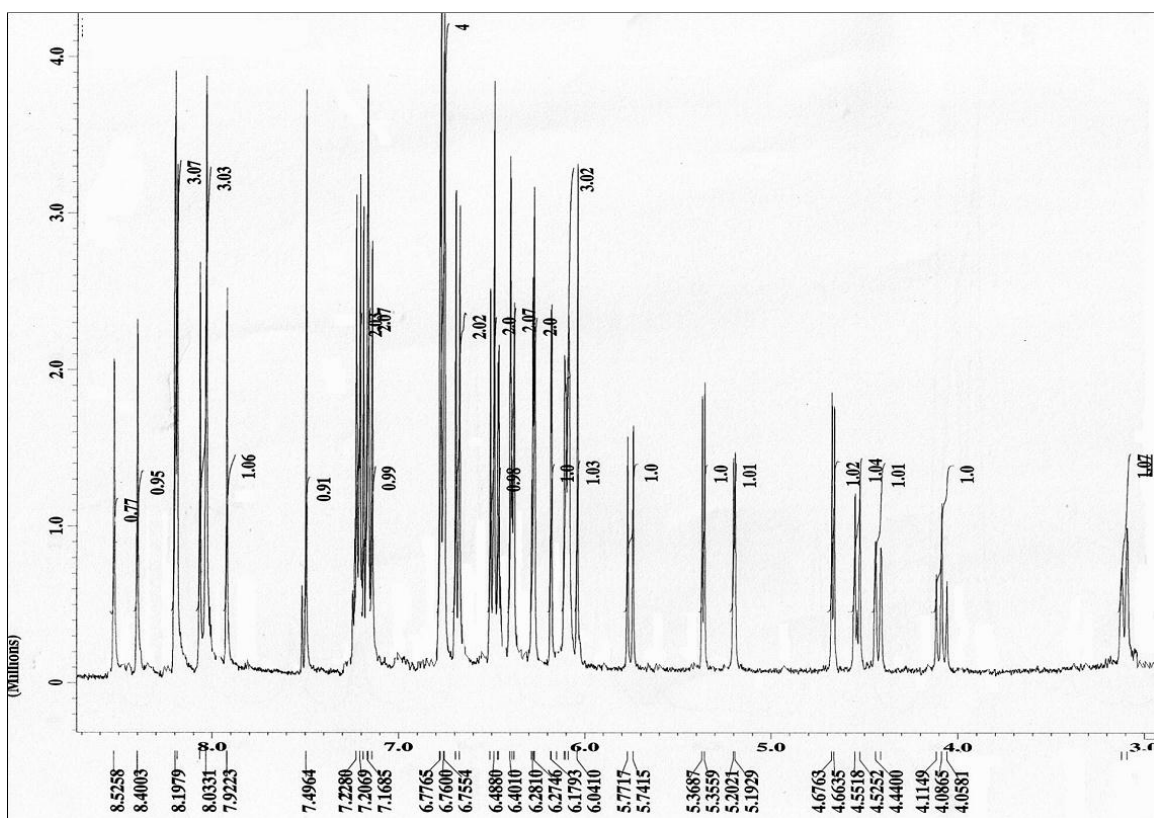

Figure 17.  $^{13}\text{C}$ -APT NMR spectrum of compound 5.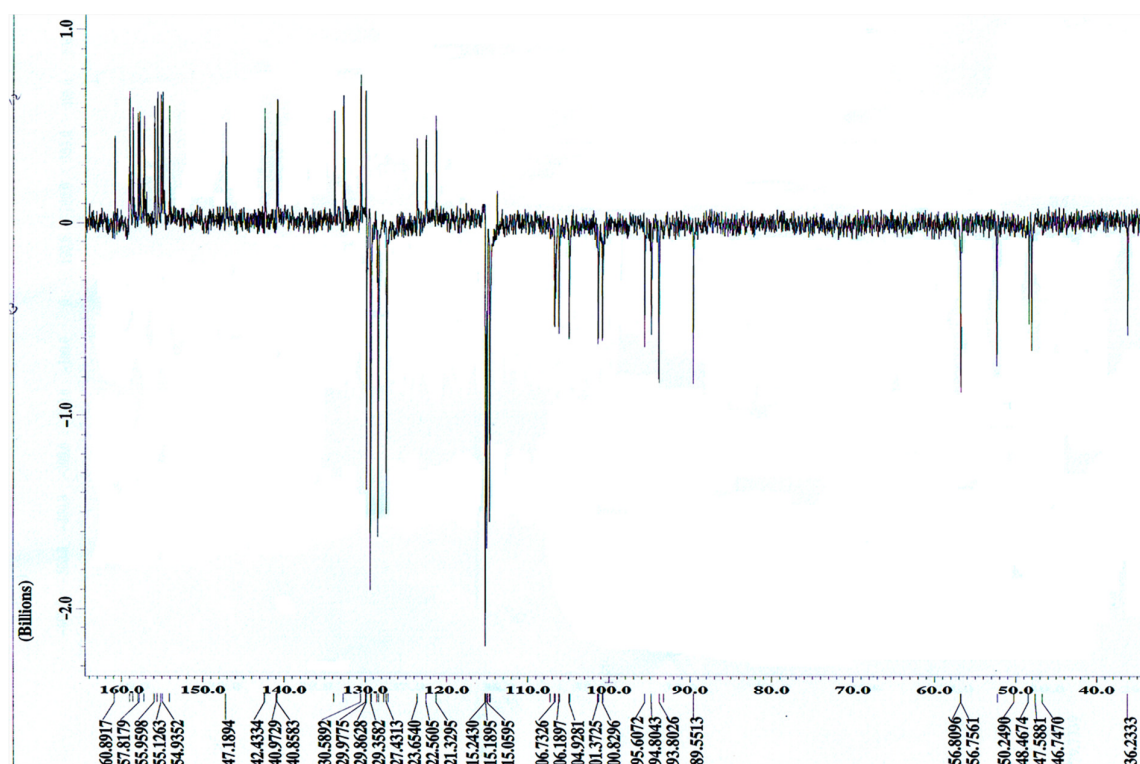Table 4.  $^{13}\text{C}$ -NMR and  $^1\text{H}$ -NMR (100 MHz and 400 MHz, acetone- $d_6$ ) spectral data of 5.

| Position | $\delta_{\text{C}}$ | $\delta_{\text{H}}$ |
|----------|---------------------|---------------------|
| 1a       | 130.0               | -                   |
| 2a/6a    | 129.4               | 7.21 (d, 8.4)       |
| 3a/5a    | 115.2               | 6.77 (d, 8.4)       |
| 4a       | 157.8               | -                   |
| 7a       | 89.6                | 5.76 (d, 12.1)      |
| 8a       | 48.1                | 4.43 (d, 11.0)      |
| 9a       | 141.0               | -                   |
| 10a      | 123.7               | -                   |
| 11a      | 154.9               | -                   |
| 12a      | 100.8               | 6.28 (d, 2.2)       |
| 13a      | 156.0               | -                   |
| 14a      | 104.9               | 6.11(d, 2.6)        |
| 1b       | 132.7               | -                   |
| 2b/6b    | 130.0               | 7.15 (d, 8.4)       |
| 3b/5b    | 114.7               | 6.69 (d, 8.4)       |
| 4b       | 155.1               | -                   |
| 7b       | 36.2                | 5.20 (d, 3.7)       |
| 8b       | 52.3                | 3.11 (br d, 11.3)   |
| 9b       | 142.4               | -                   |
| 10b      | 114.9               | -                   |
| 11b      | 158.0               | -                   |

Table 4. Cont.

| Position | $\delta_C$ | $\delta_H$     |
|----------|------------|----------------|
| 12b      | 95.6       | 6.04 (s)       |
| 13b      | 154.1      | -              |
| 14b      | 121.3      | -              |
| 1c       | 130.6      | -              |
| 2c/6c    | 128.4      | 6.39 (d, 8.4)  |
| 3c/5c    | 115.1      | 6.50 (d, 8.4)  |
| 4c       | 155.6      | -              |
| 7c       | 56.8       | 4.09 (t, 11.4) |
| 8c       | 48.5       | 4.54 (d, 10.6) |
| 9c       | 140.9      | -              |
| 10c      | 122.6      | -              |
| 11c      | 160.9      | -              |
| 12c      | 94.8       | 6.18 (d, 2.2)  |
| 13c      | 158.6      | -              |
| 14c      | 106.2      | 6.47 (d, 2.2)  |
| 1d       | 133.9      | -              |
| 2d/6d    | 127.4      | 7.18 (d, 8.8)  |
| 3d/5d    | 115.1      | 6.77 (d, 8.4)  |
| 4d       | 157.2      | -              |
| 7d       | 93.8       | 5.36 (d, 5.1)  |
| 8d       | 56.8       | 4.67 (d, 5.1)  |
| 9d       | 147.2      | -              |
| 10d/14d  | 106.7      | 6.09 (br s)    |
| 11d/13d  | 159.0      | -              |
| 12d      | 101.4      | 6.27 (t, 2.2)  |

Figure 18.  $^1\text{H}$  NMR spectrum of compound 6.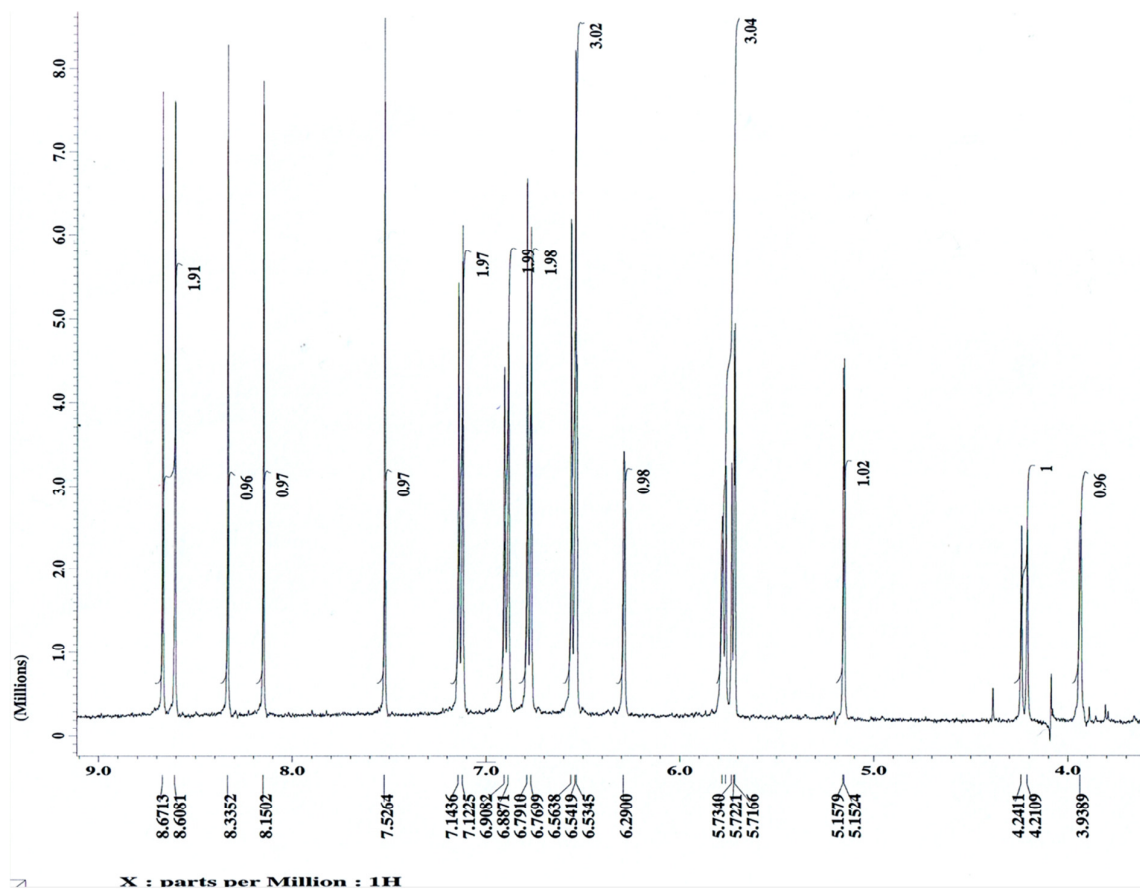Figure 19.  $^{13}\text{C}$ -APT NMR spectrum of compound 6.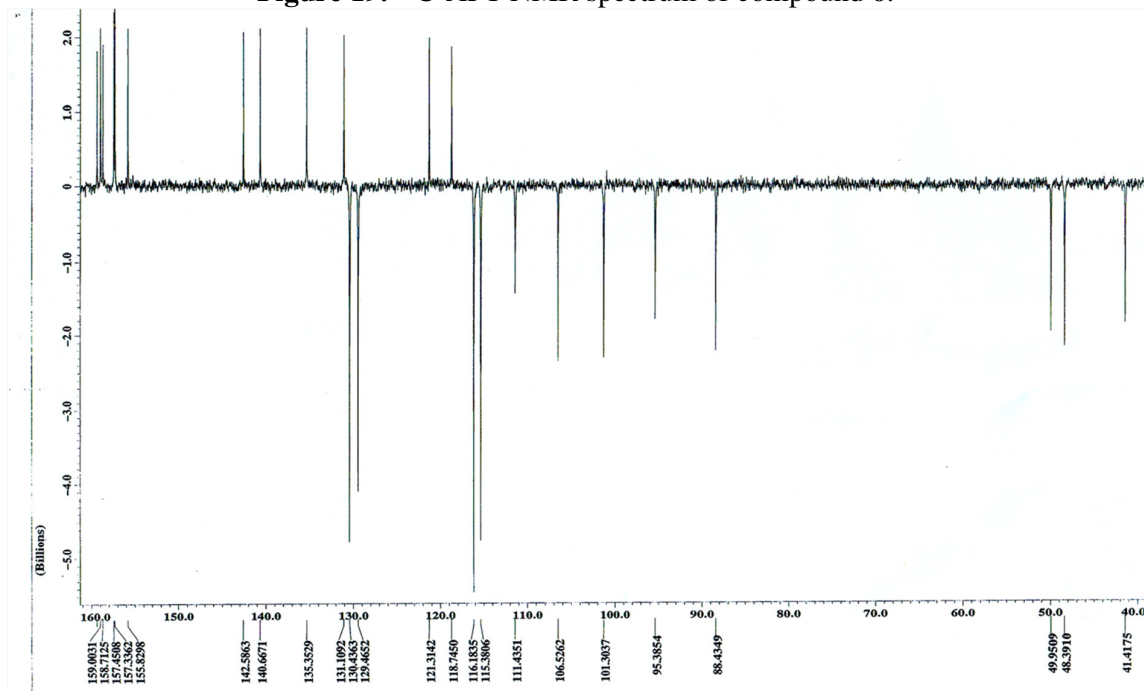

**Table 5.**  $^{13}\text{C}$ -NMR and  $^1\text{H}$ -NMR (100 MHz and 400 MHz, acetone- $d_6$ ) spectral data of **6**.

| Position | $\delta_{\text{C}}$ | $\delta_{\text{H}}$ |
|----------|---------------------|---------------------|
| 1a       | 131.1               | -                   |
| 2a/6a    | 130.4               | 7.12 (d, 8.4)       |
| 3a/5a    | 115.4               | 6.77 (d, 8.4)       |
| 4a       | 158.7               | -                   |
| 7a       | 88.4                | 5.74 (d, 12.1)      |
| 8a       | 49.9                | 4.22 (d, 12.1)      |
| 9a       | 142.6               | -                   |
| 10a      | 121.3               | -                   |
| 11a      | 159.0               | -                   |
| 12a      | 101.3               | 6.53 (br s)         |
| 13a      | 157.4               | -                   |
| 14a      | 106.5               | 6.28 (br s)         |
| 1b       | 135.4               | -                   |
| 2b/6b    | 129.5               | 6.89 (d, 8.1)       |
| 3b/5b    | 116.2               | 6.54 (d, 8.8)       |
| 4b       | 155.8               | -                   |
| 7b       | 41.4                | 5.77 (br s)         |
| 8b       | 48.4                | 3.93 (s)            |
| 9b       | 140.7               | -                   |
| 10b      | 118.7               | -                   |
| 11b      | 159.5               | -                   |
| 12b      | 95.4                | 5.71 (d, 2.2)       |
| 13b      | 157.3               | -                   |
| 14b      | 111.4               | 5.15(d, 2.2)        |
